# Supplementary material
Source: Springer Nature journal article supplement (https://www.springermedizin.de/resource/supplementary/12913_2012_2782_MOESM1_ESM.pdf/9531364)
Supplement: MOESM1 [file 9531364]

0 1 2 3 4 5 6 7 8 9 10 11 12

Referral  
system  
starts

Time 0  
n=301

Review by  
Assessor 1  
Assessor 2

Concordant  
n=233

Non-  
concordant  
n=68

Assessor  
3

Analysis

Time 1  
n=280

Review by  
Assessor 1  
Assessor 2

Concordant  
n=211

Non-  
concordant  
n=69

Assessor  
3

Analysis
